# Supplementary material for: RGS6 is an essential tumor suppressor that prevents bladder carcinogenesis by promoting p53 activation and DNMT1 downregulation
Source: PubMed Central journal article supplement (PMC5342467; doi:10.18632/oncotarget.12473), 2016-10-04
Supplement: oncotarget-07-69159-s001.pdf [file oncotarget-07-69159-s001.pdf]

# RGS6 is an essential tumor suppressor that prevents bladder carcinogenesis by promoting p53 activation and DNMT1 downregulation

## Supplementary Material

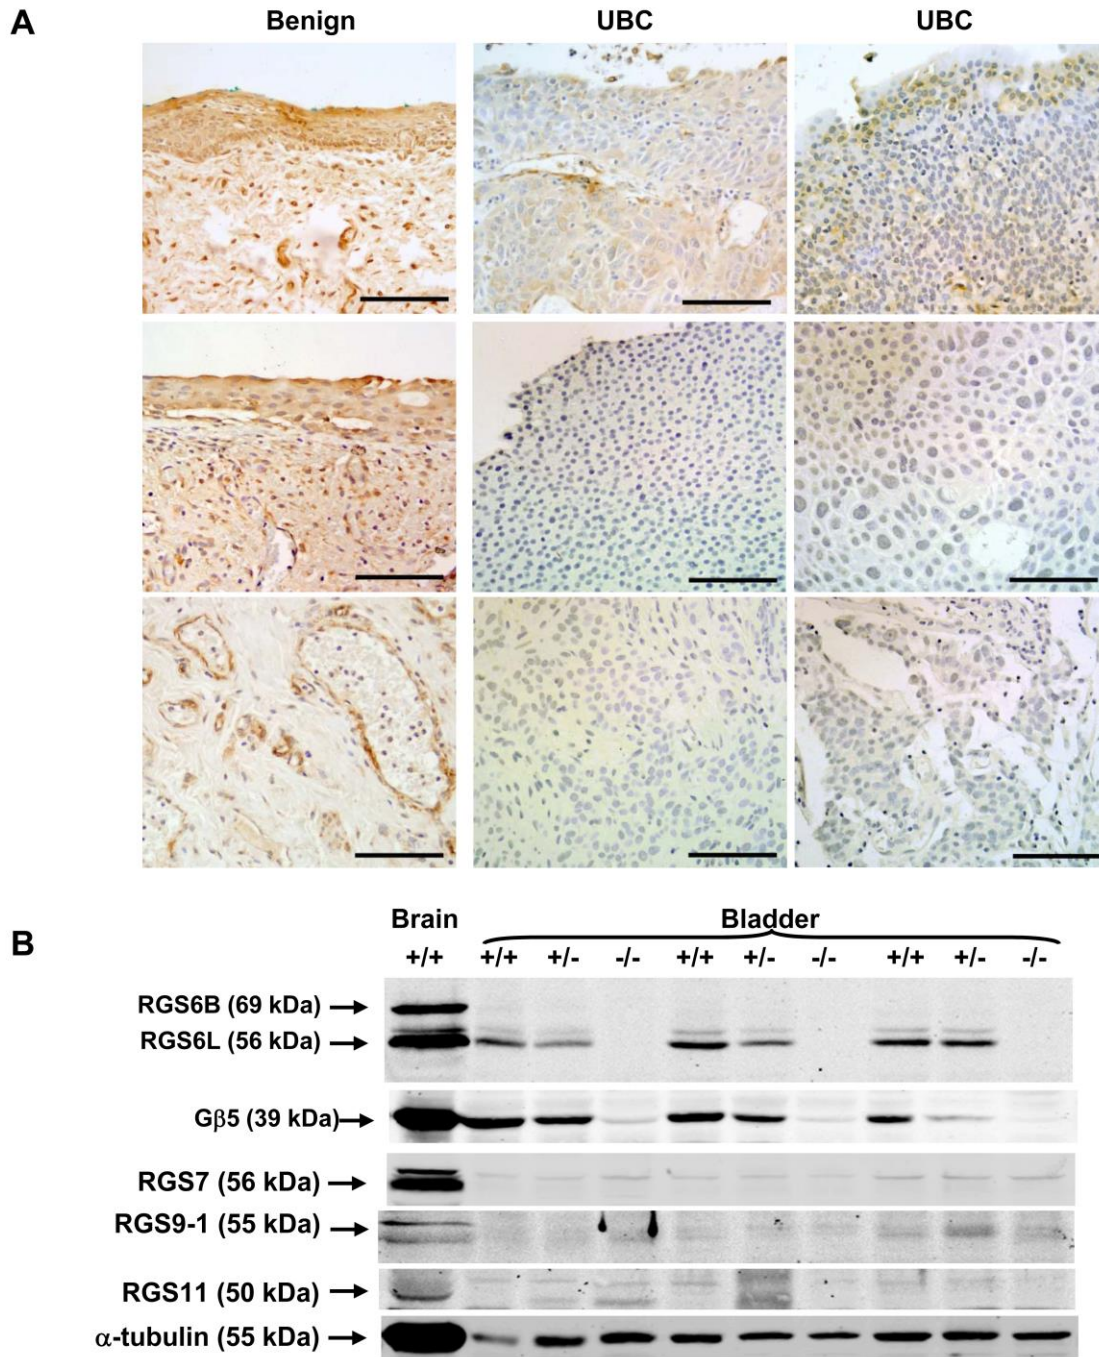

**Fig S1.** (A) Additional images showing dramatic loss of RGS6 (IHC staining, brown) in UBC human bladder tissue. Scale bar, 100  $\mu$ m (B) RGS6 is the primary R7 subfamily RGS protein expressed in mouse bladder. Levels of RGS6, RGS7, RGS9-1, RGS11, and  $\alpha$ -tubulin were determined in 20  $\mu$ g of bladder lysates using western blot.

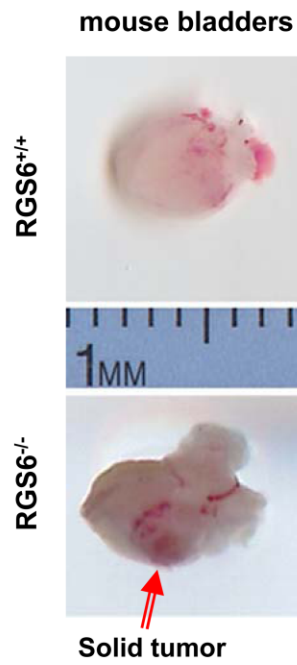

**Fig S2.** Representative image of BBN-induced solid tumor in RGS6<sup>-/-</sup> mouse bladder. Bladders were excised from RGS6<sup>+/+</sup> and RGS6<sup>-/-</sup> mice that were treated with BBN for 12 wks. Red arrow, solid tumor.

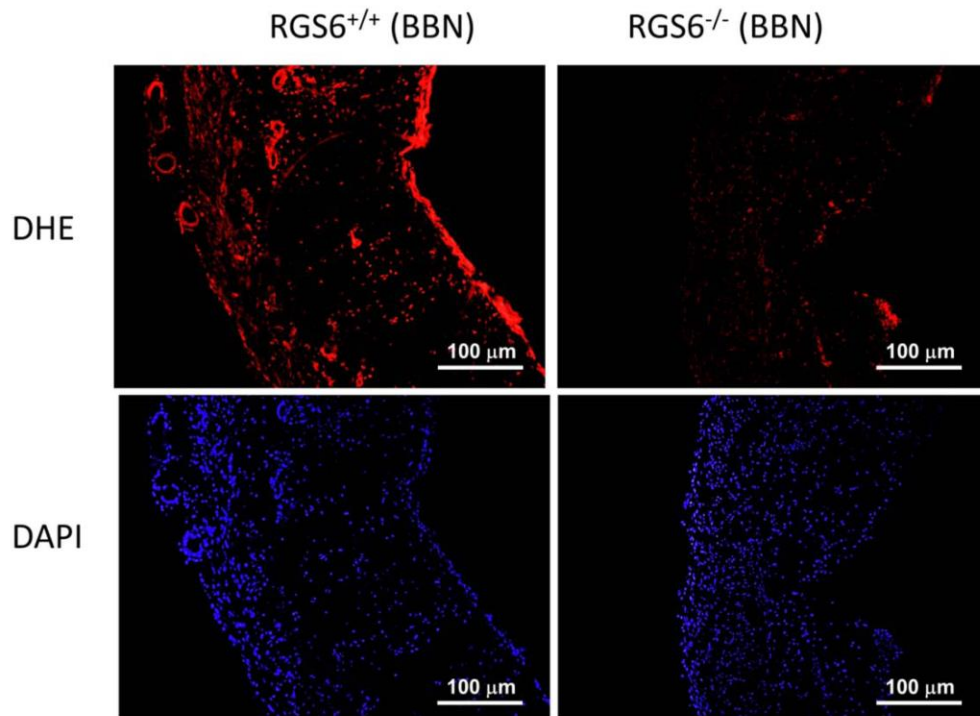

**Fig S3.** RGS6 loss is associated with a reduction in ROS generation within the mouse bladder. Mice were treated with 0.05% BBN water for 4 weeks. ROS level was measured using DHE staining.
